# Supplementary material for: Dietary Rice Bran-Modified Human Gut Microbial Consortia Confers Protection against Colon Carcinogenesis Following Fecal Transfaunation
Source: MDPI journal article supplement (doi:10.3390/biomedicines9020144), 2021-02-03
Supplement: s1 [file s1]

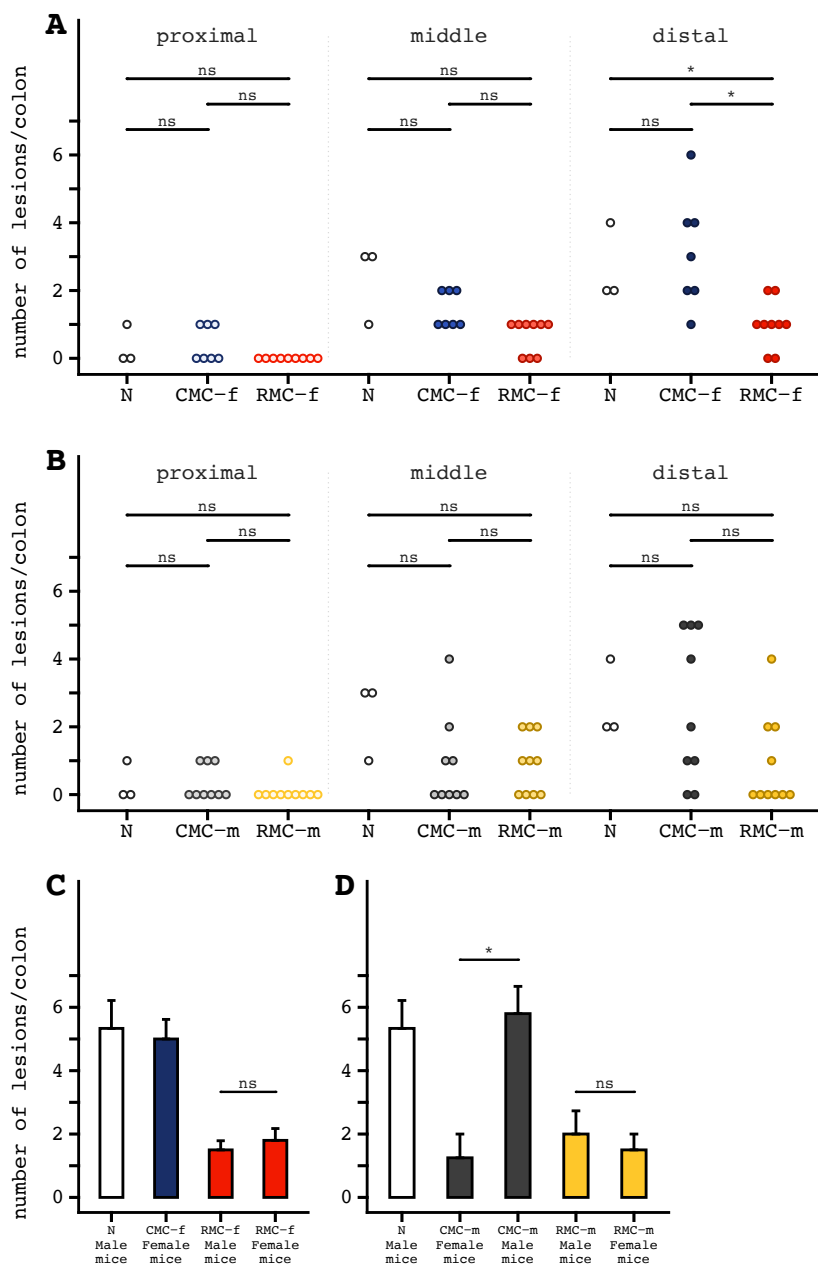

## Supplementary Figure S1

### Tumor outcomes by colon location (A-B) and effects of murine sex on tumor outcomes (C-D).

**A**, Number of neoplastic lesions in total proximal, middle, and distal regions of colon tissue for mice receiving no microbial consortia (N) when compared to control microbial consortia (CMC-f) and rice bran modified microbial consortia (RMC-f) from human female. **B**, Number of neoplastic lesions in total proximal, middle, and distal regions of colon tissue for mice receiving no microbial consortia (N) when compared to control microbial consortia (CMC-m) and rice bran modified microbial consortia (RMC-m) from human male. **C-D**, Number of neoplastic lesions in entire colon tissue comparing the sex of the mouse within individual recipient groups. Error bars represent standard error of the mean; (\*\*) indicates Benjamani-Hochberg adjusted P-value < 0.01; (\*) indicates Benjamani-Hochberg adjusted P-value < 0.05; (ns) indicates Benjamani-Hochberg adjusted P-value > 0.05.
